# Supplementary material for: Prospective multicenter validation of a next-generation sequencing panel using cytology specimens for lung cancer: cPANEL
Source: BMC Cancer. 2025 Oct 9;25:1538. doi: 10.1186/s12885-025-14770-0 (PMC12512683; doi:10.1186/s12885-025-14770-0)
Supplement: Supplementary file 2 — Supplementary Material 2. [file 12885_2025_14770_MOESM2_ESM.xlsx]

## Sheet: Sheet1
	#Supplemental Table2. List of Allele Frequency LCCP CDx
	SampleID	LCCP test Success/Fail	DNA_Yield (ng)	DNA Mutation Call1	DNA Mutation Call1_ Allerle Frequency(%)	DNA Mutation Call1_ Remarks	DNA Mutation Call2	DNA Mutation Call2_ Allerle Frequency(%)	DNA Mutation Call2_ Remarks	DNA Mutation Call3	DNA Mutation Call3_ Allerle Frequency(%)	DNA Mutation Call3_ Remarks	RNA_Yield (ng)	RNA Mutation Call1	RNA Mutation Call1_ Allerle Frequency(%)	RNA Mutation Call1_ Remarks	Adeno	DNA/RNA Negative
	cPANEL002	Success	4240	EGFR ex19 deletion	13.8								627.2	Negative			Adeno	EGFR
	cPANEL003	Success	1144	Negative									612.92	ALK fusion	26311.4		Adeno	ALK
	cPANEL004	Success	298	Negative									199.52	Negative			Adeno	Negative
	cPANEL005	Success	756	Negative									340.52	Negative			Adeno	Negative
	cPANEL006	Success	1004	EGFR L858R	30.6	EGFR p.L747S							598.16	Negative			Adeno	EGFR
	cPANEL007	Success	544	Negative									401.52	Negative			Adeno	Negative
	cPANEL008	Success	3216	Negative									2020.36	RET fusion	19131.8		Adeno	RET
	cPANEL010	Success	321.6	Negative									291.4	ROS1 fusion	20256.1		Adeno	ROS1
	cPANEL012	Success	69.2	Negative									378.72	Negative			Adeno	Negative
	cPANEL013	Success	64000	BRAF V600E	18.9								23998.3	Negative			Adeno	BRAF
	cPANEL018	Success	440	EGFR L858R	27.3								190.96	Negative			Adeno	EGFR
	cPANEL019	Success	13040	EGFR ex19 deletion	13.7								6854	Negative			Adeno	EGFR
	cPANEL020	Success	2952	Negative									2132.44	ALK fusion	3139		Adeno	ALK
	cPANEL021	Success	22400	EGFR ex20 insertion	2.8								7382.12	Negative			Adeno	EGFR
	cPANEL024	Success	178.8	EGFR ex19 deletion	39.8								224	Negative			Adeno	EGFR
	cPANEL026	Success	1324	Negative									1251.96	Negative			Adeno	Negative
	cPANEL028	Success	4360	Negative									629.52	Negative			Adeno	Negative
	cPANEL032	Success	388.4	EGFR L858R	15.2								249.72	Negative			Adeno	EGFR
	cPANEL033	Success	1016	Negative									465.96	Negative			Adeno	Negative
	cPANEL035	Success	1212	BRAF V600E	5.1								517.24	Negative			Adeno	BRAF
	cPANEL036	Success	33.8	EGFR L858R	22.4								410.24	Negative			Adeno	EGFR
	cPANEL037	Success	1984	EGFR L858R	41.3		Other	1.6	ERBB2 p.S310Y				476.04	Negative			Adeno	EGFR
	cPANEL038	Success	56.8	Other	9.6	KRAS p.G12D							219.84	Negative			Adeno	EGFR
	cPANEL040	Success	1396	Negative									7739.56	Negative			Adeno	Negative
	cPANEL041	Success	1200	Negative									2973.32	Negative			Adeno	Negative
	cPANEL042	Success	5960	EGFR ex19 deletion	54.8								2975.12	Negative			Adeno	EGFR
	cPANEL044	Success	968	KRAS G12C	29.1								460.56	Negative			Adeno	KRAS
	cPANEL045	Success	444	EGFR ex19 deletion	5.5								394.16	Negative			Adeno	EGFR
	cPANEL046	Success	2448	Other	39.7	EGFR p.G779C							523.2	Negative			Adeno	EGFR
	cPANEL048	Success	400	EGFR E709X	14		Other	13.4	EGFR p.G719S				382.68	Negative			Adeno	EGFR
	cPANEL050	Success	2648	Other	57.9	KRAS p.G13D							440.52	Negative			Adeno	KRAS
	cPANEL051	Success	9040	Negative									7323.96	Negative			Adeno	Negative
	cPANEL052	Success	952	Negative									589.28	Negative			Adeno	Negative
	cPANEL056	Success	164.8	HER2 ex20 insertion	35.5								431.24	Negative			Adeno	ERBB2
	cPANEL057	Success	532	Negative									415.48	ALK fusion	9099.9		Adeno	ALK
	cPANEL060	Success	254.8	Negative									414.2	Negative			Adeno	Negative
	cPANEL062	Success	1720	EGFR L858R	60.8								472.76	Negative			Adeno	EGFR
	cPANEL063	Success	4800	Negative									5062	Negative			Adeno	Negative
	cPANEL064	Success	42400	Negative									14346.5	ALK fusion	60060.1		Adeno	ALK
	cPANEL065	Success	1140	Negative									599.64	Negative			Adeno	Negative
	cPANEL066	Success	304.4	Negative									223.32	Negative			Adeno	Negative
	cPANEL067	Success	360.8	Negative									691.32	Negative			Adeno	Negative
	cPANEL070	Success	996	Negative									655.28	Negative			Adeno	Negative
	cPANEL071	Success	960	Negative									370.36	Negative			Adeno	Negative
	cPANEL072	Success	560	Negative									397.28	Negative			Adeno	Negative
	cPANEL073	Success	46	EGFR ex19 deletion	7.7								280.16	Negative			Adeno	EGFR
	cPANEL077	Success	46.4	EGFR L858R	8.3		EGFR E709X	5.7	EGFR p.E709G				397.92	Negative			Adeno	EGFR
	cPANEL078	Success	980	Negative									290.36	Negative			Adeno	Negative
	cPANEL082	Success	852	Negative									401.84	Negative			Adeno	Negative
	cPANEL085	Success	1136	Negative									971.88	Negative			Adeno	Negative
	cPANEL086	Success	1012	Negative									477.48	RET fusion	768		Adeno	RET
	cPANEL088	Success	604	KRAS G12C	66.6								239.08	Negative			Adeno	KRAS
	cPANEL089	Success	1928	EGFR ex20 insertion	71.7								15260	Negative			Adeno	EGFR
	cPANEL090	Success	29.72	KRAS G12C	10.2								198.24	Negative			Adeno	KRAS
	cPANEL094	Success	24480	Negative									14546	ALK fusion	26795.5		Adeno	ALK
	cPANEL095	Fail	4.2										286.64				Adeno	Fail
	cPANEL096	Success	98.8	Negative									275.56	Negative			Adeno	Negative
	cPANEL097	Success	1496	EGFR ex19 deletion	40.1								1859.88	Negative			Adeno	EGFR
	cPANEL098	Success	2000	EGFR ex19 deletion	59.8								822.8	Negative			Adeno	EGFR
	cPANEL099	Success	380.4	Negative									555.8	Negative			Adeno	Negative
	cPANEL100	Success	1268	Other	16.3	KRAS p.G12V							397.8	Negative			Adeno	KRAS
	cPANEL101	Success	1124	Negative									454.72	Negative			Adeno	Negative
	cPANEL102	Success	2564	Other	49.7	KRAS p.G12D							1459.2	Negative			Adeno	KRAS
	cPANEL104	Success	19.32	Negative									193.52	Negative			Adeno	Negative
	cPANEL106	Success	2116	KRAS G12C	31.2								1784.96	Negative			Adeno	KRAS
	cPANEL108	Success	804	EGFR L861Q	80.2								515.6	Negative			Adeno	EGFR
	cPANEL109	Success	366	Negative									228.72	Negative			Adeno	Negative
	cPANEL110	Success	688	Negative									405.88	Negative			Adeno	Negative
	cPANEL111	Success	231.6	Negative									228.84	Negative			Adeno	Negative
	cPANEL113	Success	524	EGFR L858R	18.6								302.6	Negative			Adeno	EGFR
	cPANEL114	Success	1880	EGFR L858R	1.3								158.28	Negative			Adeno	EGFR
	cPANEL115	Success	252.8	EGFR L858R	27.4								736.24	Negative			Adeno	EGFR
	cPANEL116	Fail	7.12										282.56				Adeno	Fail
	cPANEL118	Success	684	Negative									431.52	Negative			Adeno	Negative
	cPANEL123	Success	210	EGFR ex19 deletion	58.9								305.64	Negative			Adeno	EGFR
	cPANEL124	Success	7088	Negative									8726.36	Negative			Adeno	Negative
	cPANEL129	Success	26.88	EGFR ex19 deletion	19.7								208.56	Negative			Adeno	EGFR
	cPANEL133	Success	15.4	Negative									263	Negative			Adeno	Negative
	cPANEL135	Success	3048	Negative									1203.2	Negative			Adeno	Negative
	cPANEL139	Success	624	EGFR ex19 deletion	1.4								186.9	Negative			Adeno	EGFR
	cPANEL140	Success	1440	Negative									402	Negative			Adeno	Negative
	cPANEL141	Success	496	EGFR L858R	5.6								3565.1	Negative			Adeno	EGFR
	cPANEL142	Success	140.8	KRAS G12C	12.4								199.6	Negative			Adeno	KRAS
	cPANEL143	Success	468	KRAS G12C	40.4								263.4	Negative			Adeno	KRAS
	cPANEL144	Success	177.6	EGFR ex19 deletion	60.9								257.7	Negative			Adeno	EGFR
	cPANEL145	Success	39.76	Other	4	KRAS p.G12D							211.96	Negative			Adeno	KRAS
	cPANEL149	Success	247.2	Negative									176.12	RET fusion	22772	K15Ret12	Adeno	RET
	cPANEL152	Success	472	EGFR ex19 deletion	88.1								448.56	Negative			Adeno	EGFR
	cPANEL153	Success	1320	EGFR ex19 deletion	56								693.4	Negative			Adeno	EGFR
	cPANEL154	Success	2232	BRAF V600E	2								940.8	Negative			Adeno	BRAF
	cPANEL156	Success	21.28	EGFR L858R	54.4								169.88	Negative			Adeno	EGFR
	cPANEL157	Success	464	Other	59.1	MET ex14_skip(DNA)							406.8	MET ex14 skipping	1944.1		Adeno	MET
	cPANEL158	Success	10960	EGFR L858R	87.5								1713.32	Negative			Adeno	EGFR
	cPANEL159	Success	12080	EGFR ex19 deletion	88.4								23521.6	Negative			Adeno	EGFR
	cPANEL160	Success	456	EGFR ex20 insertion	55								494.2	Negative			Adeno	EGFR
	cPANEL162	DNAFail、RNASuccess	2.83										230.12				Adeno	Fail
	cPANEL165	Success	544	Negative									840	Negative			Adeno	Negative
	cPANEL167	Success	408	Negative									472.32	Negative			Adeno	Negative
	cPANEL169	Success	290.4	EGFR G719X	27.3								449.72	Negative			Adeno	EGFR
	cPANEL171	Success	236	EGFR G719X	11.5								240.48	Negative			Adeno	EGFR
	cPANEL173	Success	53750	Negative									9440.92	Negative			Adeno	Negative
	cPANEL174	Success	492	Negative									564.68	Negative			Adeno	Negative
	cPANEL178	Success	35.36	Negative									186.64	Negative			Adeno	Negative
	cPANEL180	Success	160.8	Negative									239.76	Negative			Adeno	Negative
	cPANEL181	Success	1312	EGFR ex19 deletion	1.5								771.68	Negative			Adeno	EGFR
	cPANEL186	Success	7360	KRAS G12C	65.8								3439.4	Negative			Adeno	KRAS
	cPANEL187	Success	121.6	EGFR L858R	55.4								318.04	Negative			Adeno	EGFR
	cPANEL196	Success	109.6	EGFR L858R	35.2								213.48	Negative			Adeno	EGFR
	cPANEL200	Success	1112	EGFR G719X	28.3	EGFR p.G719C							870	Negative			Adeno	EGFR
	cPANEL202	Success	26.64	Other	42.1	MET ex14_skipping(DNA)							179	MET ex14 skipping	199.6	METex14_skip	Adeno	MET
	cPANEL204	Success	1712	KRAS G12C	14.1								505.84	Negative			Adeno	KRAS
	cPANEL205	Success	316.8	Negative									348.32	Negative			Adeno	Negative
	cPANEL210	Success	62	Negative									245.36	Negative			Adeno	Negative
	cPANEL211	Success	259.2	EGFR ex19 deletion	31.4	EGFR p.E746_A750del							175.8	Negative			Adeno	EGFR
	cPANEL212	Success	226.4	Negative									239.96	Negative			Adeno	Negative
	cPANEL219	Success	12160	Negative									1203.72	ALK fusion	46565.6	E6_A20	Adeno	ALK
	cPANEL222	Success	1000	Negative									747.4	Negative			Adeno	Negative
	cPANEL224	Success	1384	Negative									510.08	Negative			Adeno	Negative
	cPANEL226	Success	26.08	EGFR ex20 insertion	2.2	EGFR p.D770delinsGY							191.52	Negative			Adeno	EGFR
	cPANEL227	Success	17.6	KRAS G12C	11.9								259.6	Negative			Adeno	KRAS
	cPANEL228	Success	15.44	EGFR L858R	17.1								165.76	Negative			Adeno	EGFR
	cPANEL229	Success	23.76	EGFR ex19 deletion	16.4	EGFR p.E746_S752delinsV	KRAS G12C	0.5					96.4	Negative			Adeno	EGFR
	cPANEL230	Success	10.8	Negative									250.76	Negative			Adeno	Negative
	cPANEL232	Success	408	EGFR L858R	0.8								330.72	Negative			Adeno	EGFR
	cPANEL234	Success	15.28	Negative									896.52	Negative			Adeno	Negative
	cPANEL242	Success	85.6	Negative									627.96	Negative			Adeno	Negative
	cPANEL248	Success	1216	HER2 ex20 insertion	30.3	ERBB2 p.Y772_A775dup							965.52	Negative			Adeno	ERBB2
	cPANEL249	Success	24.96	EGFR L858R	1.6								208.72	Negative			Adeno	EGFR
	cPANEL250	Success	248.8	EGFR L858R	53.7								354.76	Negative			Adeno	EGFR
	cPANEL251	Success	116.8	Other	2.9	KRAS p.G12V							184.4	Negative			Adeno	KRAS
	cPANEL252	Success	5920	Negative									235.32	Negative			Adeno	Negative
	cPANEL255	Success	168.8	EGFR L858R	76.9								331.92	Negative			Adeno	EGFR
	cPANEL256	Success	3288	Negative									2837.2	Negative			Adeno	Negative
	cPANEL258	Success	62.4	EGFR L858R	2.8								230.4	Negative			Adeno	EGFR
	cPANEL260	Success	40.4	KRAS G12C	11.2								285.28	Negative			Adeno	KRAS
	cPANEL263	Success	115.2	Negative									264.4	ALK fusion	49359	E6ins33_A20[49359.0]	Adeno	ALK
	cPANEL268	Success	436	KRAS G12C	50.8								339.84	Negative			Adeno	KRAS
	cPANEL270	Success	377.6	EGFR ex19 deletion	1.1	EGFR p.L747_P753delinsS							356.36	Negative			Adeno	EGFR
	cPANEL274	Success	100	Negative									625.8	Negative			Adeno	Negative
	cPANEL277	Success	928	EGFR L858R	23.7								876.36	Negative			Adeno	EGFR
	cPANEL280	Success	2064	EGFR L858R	32		Other	21.5	EGFR p.T790M	Other	33.1	EGFR p.L747S	554.68	Negative			Adeno	EGFR
	cPANEL282	Success	160	EGFR L858R	24.2		Other	25.8	EGFR p.E709G				423.2	Negative			Adeno	EGFR
	cPANEL284	Success	856	EGFR L858R	79.8								375.76	Negative			Adeno	EGFR
	cPANEL287	Success	568	Negative									517	Negative			Adeno	Negative
	cPANEL288	Success	1720	Negative									1589.36	Negative			Adeno	Negative
	cPANEL289	Success	548	Negative									331.48	Negative			Adeno	Negative
	cPANEL290	Success	2304	Negative									522.08	Negative			Adeno	Negative
	cPANEL291	Success	1048	Negative									529.56	Negative			Adeno	Negative
	cPANEL292	Success	84	EGFR L858R	1.3								246.36	Negative			Adeno	EGFR
	cPANEL293	Success	348	EGFR ex19 deletion	21.9	EGFR p.E746_A750del							327.76	Negative			Adeno	EGFR
	cPANEL295	Success	105.6	Other	26.6	KRAS p.G12V							220.4	Negative			Adeno	KRAS
	cPANEL297	Success	18	Negative									182.36	Negative			Adeno	Negative
	cPANEL299	Success	346	EGFR L858R	8.8								181.48	Negative			Adeno	EGFR
