# Supplementary material for: Prospective multicenter validation of a next-generation sequencing panel using cytology specimens for lung cancer: cPANEL
Source: BMC Cancer. 2025 Oct 9;25:1538. doi: 10.1186/s12885-025-14770-0 (PMC12512683; doi:10.1186/s12885-025-14770-0)
Supplement: Supplementary file 3 — Supplementary Material 3. [file 12885_2025_14770_MOESM3_ESM.xlsx]

## Sheet: Sheet1
#Supplemental Table3 Quality assessment result of purified nucleotide
				DIN	RIN
			Median	9.2	4.7
				DNA yield	RNA Yield
			Median	546	426.48
			N.D.: Not determined due to low signal
SampleID	DIN	dsDNA_Yield(ng)	RIN	RNA_Yield(ng)	CytologyCategory
cPANEL002	9.3	4240	3.9	627.2	EBUS-TBB-brushing
cPANEL003	9.4	1144	2.9	612.92	CT-guided needle washing
cPANEL004	8.2	298	4.5	199.52	EBUS-TBB-brushing
cPANEL005	9.6	756	3.6	340.52	EBUS-TBB-brushing
cPANEL006	9.3	1004	3.4	598.16	EBUS-TBB-brushing
cPANEL007	9.1	544	3.5	401.52	Thoracoscopic brushing/Other
cPANEL008	9.2	3216	2.9	2020.36	EBUS-TBB-brushing
cPANEL009	8.1	262.4	4.2	409.28	EBUS-TBB-brushing
cPANEL010	9.6	321.6	5.6	291.4	EBUS-TBB-brushing
cPANEL012	7	69.2	4.9	378.72	EBUS-TBB-brushing
cPANEL013	8.4	64000	4.1	23998.3	Pleural effusion
cPANEL015	8	2768	5.6	644.92	CT-guided needle washing
cPANEL018	9.5	440	3.7	190.96	EBUS-TBB-brushing
cPANEL019	8.9	13040	5.6	6854	Pleural effusion
cPANEL020	9.4	2952	3.9	2132.44	CT-guided needle washing
cPANEL021	9	22400	4.8	7382.12	Pleural effusion
cPANEL022	8	492	N.D.	237.44	EBUS-TBB-brushing
cPANEL023	8.9	179.6	4.9	199.84	EBUS-TBB-brushing
cPANEL024	9	178.8	4.1	224	EBUS-TBB-brushing
cPANEL025	9.1	25440	4	9830.92	Pleural effusion
cPANEL026	9	1324	2.8	1251.96	EBUS-TBB-brushing
cPANEL027	9.2	616	6.2	437.08	EBUS-TBNA, EUS-FNA needle washing
cPANEL028	7.9	4360	5.5	629.52	EBUS-TBB-brushing
cPANEL029	9.4	215.6	6.1	309.24	CT-guided needle washing
cPANEL030	N.D.	24.96	N.D.	408.36	EBUS-TBB-brushing
cPANEL032	9.5	388.4	N.D.	249.72	EBUS-TBB-brushing
cPANEL033	9.4	1016	3.5	465.96	EBUS-TBB-brushing
cPANEL034	7.3	2992	6.3	717.24	CT-guided needle washing
cPANEL035	9.2	1212	8.9	517.24	Pleural effusion
cPANEL036	N.D.	33.8	N.D.	410.24	EBUS-TBB-brushing
cPANEL037	9.2	1984	3.1	476.04	EBUS-TBB-brushing
cPANEL038	N.D.	56.8	N.D.	219.84	EBUS-TBB-brushing
cPANEL039	7.7	2336	3.4	324.36	CT-guided needle washing
cPANEL040	9.1	1396	6.1	7739.56	Pleural effusion
cPANEL041	7.3	1200	3.8	2973.32	EBUS-TBB-brushing
cPANEL042	9.2	5960	3.8	2975.12	EBUS-TBB-brushing
cPANEL043	6.4	1752	4.2	555.36	EBUS-TBB-brushing
cPANEL044	8.8	968	5.9	460.56	EBUS-TBNA, EUS-FNA needle washing
cPANEL045	9.5	444	4.3	394.16	EBUS-TBB-brushing
cPANEL046	8.2	2448	3.7	523.2	EBUS-TBB-brushing
cPANEL047	7.5	2152	4.4	536.6	EBUS-TBB-brushing
cPANEL048	9.4	400	4.9	382.68	EBUS-TBB-brushing
cPANEL049	9.3	1440	2.6	863.08	EBUS-TBB-brushing
cPANEL050	8.7	2648	3.8	440.52	EBUS-TBB-brushing
cPANEL051	8.8	9040	5.6	7323.96	Pleural effusion
cPANEL052	9.4	952	6.4	589.28	EBUS-TBNA, EUS-FNA needle washing
cPANEL053	9	5040	6	2355.6	CT-guided needle washing
cPANEL054	9.2	264.4	6.9	189.16	CT-guided needle washing
cPANEL056	8.3	164.8	3	431.24	EBUS-TBB-brushing
cPANEL057	8.8	532	4.5	415.48	EBUS-TBB-brushing
cPANEL060	8.6	254.8	4.5	414.2	EBUS-TBNA, EUS-FNA needle washing
cPANEL061	9.3	2820	1.5	2987.08	Pleural effusion
cPANEL062	9.3	1720	2.5	472.76	EBUS-TBB-brushing
cPANEL063	8.6	4800	3.6	5062	EBUS-TBB-brushing
cPANEL064	N.D.	42400	5.4	14346.5	Pleural effusion
cPANEL065	9.1	1140	3.4	599.64	EBUS-TBB-brushing
cPANEL066	8.3	304.4	3.2	223.32	EBUS-TBB-brushing
cPANEL067	9.3	360.8	4.8	691.32	EBUS-TBB-brushing
cPANEL068	9.3	5080	3.3	6388.08	Pleural effusion
cPANEL069	8.1	69.2	N.D.	188.4	EBUS-TBB-brushing
cPANEL070	8	996	3.3	655.28	EBUS-TBNA, EUS-FNA needle washing
cPANEL071	9	960	4.7	370.36	EBUS-TBB-brushing
cPANEL072	9.4	560	5.2	397.28	EBUS-TBB-brushing
cPANEL073	N.D.	46	N.D.	280.16	EBUS-TBB-brushing
cPANEL074	8.1	356	6.2	632.44	EBUS-TBNA, EUS-FNA needle washing
cPANEL075	1	1804	3.2	431	EBUS-TBNA, EUS-FNA needle washing
cPANEL076	9.6	1044	4.1	1147.52	EBUS-TBB-brushing
cPANEL077	N.D.	46.4	3.5	397.92	EBUS-TBB-brushing
cPANEL078	9	980	5.1	290.36	EBUS-TBB-brushing
cPANEL079	N.D.	40.8	4.2	301.76	EBUS-TBB-brushing
cPANEL080	8	1012	4.9	825	EBUS-TBNA, EUS-FNA needle washing
cPANEL081	6.6	210	N.D.	333.16	CT-guided needle washing
cPANEL082	8.9	852	4.1	401.84	EBUS-TBB-brushing
cPANEL084	9.1	964	4.7	688	EBUS-TBB-brushing
cPANEL085	8.7	1136	4.4	971.88	EBUS-TBNA, EUS-FNA needle washing
cPANEL086	9.3	1012	3	477.48	EBUS-TBB-brushing
cPANEL087	8.3	460	4.1	356.84	CT-guided needle washing
cPANEL088	9.3	604	6.1	239.08	EBUS-TBB-brushing
cPANEL089	8.3	1928	6.6	15260	Pleural effusion
cPANEL090	N.D.	29.72	5.9	198.24	EBUS-TBB-brushing
cPANEL092	9.2	604	6.5	235.36	EBUS-TBB-brushing
cPANEL093	8.8	1372	7.6	500.76	Thoracoscopic brushing/Other
cPANEL094	7.7	24480	4.1	14546	Pleural effusion
cPANEL095	N.D.	4.2	N.D.	286.64	EBUS-TBNA, EUS-FNA needle washing
cPANEL096	9.2	98.8	6.1	275.56	EBUS-TBB-brushing
cPANEL097	8.7	1496	7.7	1859.88	Thoracoscopic brushing/Other
cPANEL098	9.3	2000	3.4	822.8	EBUS-TBB-brushing
cPANEL099	9.3	380.4	2.1	555.8	EBUS-TBB-brushing
cPANEL100	8.9	1268	N.D.	397.8	EBUS-TBB-brushing
cPANEL101	9.5	1124	3.8	454.72	EBUS-TBB-brushing
cPANEL102	8.1	2564	6.2	1459.2	Thoracoscopic brushing/Other
cPANEL103	7.8	30320	3.6	1485.64	EBUS-TBNA, EUS-FNA needle washing
cPANEL104	N.D.	19.32	N.D.	193.52	EBUS-TBB-brushing
cPANEL106	6.9	2116	5.7	1784.96	EBUS-TBNA, EUS-FNA needle washing
cPANEL107	8.4	2240	7.6	289.36	EBUS-TBB-brushing
cPANEL108	7.6	804	5.6	515.6	EBUS-TBNA, EUS-FNA needle washing
cPANEL109	9.6	366	6.3	228.72	EBUS-TBB-brushing
cPANEL110	9.2	688	5.2	405.88	EBUS-TBNA, EUS-FNA needle washing
cPANEL111	9.3	231.6	6.4	228.84	EBUS-TBNA, EUS-FNA needle washing
cPANEL112	9.1	287.2	6.2	246.72	EBUS-TBB-brushing
cPANEL113	9.6	524	5.2	302.6	EBUS-TBB-brushing
cPANEL114	8.9	1880	N.D.	158.28	Pleural effusion
cPANEL115	7.8	252.8	2.8	736.24	EBUS-TBB-brushing
cPANEL116	N.D.	7.12	N.D.	282.56	EBUS-TBNA, EUS-FNA needle washing
cPANEL117	8.2	1096	7.6	650.2	EBUS-TBB-brushing
cPANEL118	N.D.	684	N.D.	431.52	EBUS-TBB-brushing
cPANEL119	7.9	114.8	N.D.	187.04	CT-guided needle washing
cPANEL120	8.8	337.2	5.4	242.04	EBUS-TBB-brushing
cPANEL122	9.3	492	3.1	579.44	EBUS-TBB-brushing
cPANEL123	8.6	210	N.D.	305.64	EBUS-TBNA, EUS-FNA needle washing
cPANEL124	9.1	7088	5.2	8726.36	EBUS-TBNA, EUS-FNA needle washing
cPANEL125	9	3176	5.2	468.72	EBUS-TBB-brushing
cPANEL126	8.8	848	3.3	772.12	EBUS-TBB-brushing
cPANEL129	N.D.	26.88	N.D.	208.56	EBUS-TBB-brushing
cPANEL132	8	108.8	N.D.	205.8	EBUS-TBB-brushing
cPANEL133	N.D.	15.4	N.D.	263	EBUS-TBB-brushing
cPANEL134	N.D.	14.2	N.D.	252.4	EBUS-TBB-brushing
cPANEL135	9	3048	4.3	1203.2	EBUS-TBNA, EUS-FNA needle washing
cPANEL136	9.7	396.8	5.6	254.8	EBUS-TBNA, EUS-FNA needle washing
cPANEL137	9.5	1232	3.7	543.3	EBUS-TBB-brushing
cPANEL138	9.6	840	2.9	383.9	EBUS-TBB-brushing
cPANEL139	9.2	624	3.1	186.9	EBUS-TBB-brushing
cPANEL140	9.6	1440	4.9	402	EBUS-TBB-brushing
cPANEL141	9.6	496	7.4	3565.1	Thoracoscopic brushing/Other
cPANEL142	9.4	140.8	5.7	199.6	EBUS-TBB-brushing
cPANEL143	9.5	468	5.9	263.4	EBUS-TBNA, EUS-FNA needle washing
cPANEL144	9.7	177.6	5.8	257.7	EBUS-TBB-brushing
cPANEL145	N.D.	39.76	N.D.	211.96	EBUS-TBB-brushing
cPANEL149	9.8	247.2	N.D.	176.12	EBUS-TBB-brushing
cPANEL150	9.8	808	5.2	438.6	EBUS-TBB-brushing
cPANEL151	9.4	780	6	1210.92	EBUS-TBB-brushing
cPANEL152	9.3	472	4.1	448.56	CT-guided needle washing
cPANEL153	8.9	1320	4.6	693.4	CT-guided needle washing
cPANEL154	4.4	2232	5.4	940.8	EBUS-TBNA, EUS-FNA needle washing
cPANEL155	7.6	155.2	5.6	208.16	EBUS-TBB-brushing
cPANEL156	N.D.	21.28	5	169.88	EBUS-TBB-brushing
cPANEL157	9.5	464	3.2	406.8	EBUS-TBB-brushing
cPANEL158	9	10960	3.8	1713.32	EBUS-TBNA, EUS-FNA needle washing
cPANEL159	8.9	12080	5.7	23521.6	Pleural effusion
cPANEL160	9.4	456	4.1	494.2	EBUS-TBB-brushing
cPANEL161	8	1064	2.6	1335.72	EBUS-TBB-brushing
cPANEL162	N.D.	2.83	N.D.	230.12	Thoracoscopic brushing/Other
cPANEL163	N.D.	30.08	N.D.	145.48	CT-guided needle washing
cPANEL164	9.5	3312	4.9	1071.68	CT-guided needle washing
cPANEL165	9.7	544	5.3	840	EBUS-TBNA, EUS-FNA needle washing
cPANEL166	9.6	209.6	6.7	240.52	CT-guided needle washing
cPANEL167	9.4	408	5.9	472.32	CT-guided needle washing
cPANEL168	9.3	112	6.6	153.4	EBUS-TBNA, EUS-FNA needle washing
cPANEL169	9.1	290.4	1.9	449.72	EBUS-TBB-brushing
cPANEL171	9.6	236	5.6	240.48	EBUS-TBB-brushing
cPANEL173	9.4	53750	2.5	9440.92	Pleural effusion
cPANEL174	9.6	492	6.2	564.68	CT-guided needle washing
cPANEL175	8.9	67.2	1.3	248.16	CT-guided needle washing
cPANEL176	9.7	1352	3	761.4	EBUS-TBB-brushing
cPANEL178	N.D.	35.36	3.3	186.64	EBUS-TBB-brushing
cPANEL179	9	6080	4.9	4256	EBUS-TBNA, EUS-FNA needle washing
cPANEL180	9.7	160.8	N.D.	239.76	EBUS-TBB-brushing
cPANEL181	9.6	1312	7.2	771.68	EBUS-TBNA, EUS-FNA needle washing
cPANEL185	9.6	572	6.7	608.88	EBUS-TBNA, EUS-FNA needle washing
cPANEL186	9.4	7360	2.2	3439.4	EBUS-TBNA, EUS-FNA needle washing
cPANEL187	7.3	121.6	5.4	318.04	EBUS-TBB-brushing
cPANEL188	N.D.	18.75	N.D.	110.2	CT-guided needle washing
cPANEL193	N.D.	68.8	N.D.	184.6	EBUS-TBB-brushing
cPANEL194	8.9	3792	6.9	789.48	EBUS-TBNA, EUS-FNA needle washing
cPANEL196	7.9	109.6	3.1	213.48	EBUS-TBB-brushing
cPANEL197	6.9	199.2	3.9	934.68	Thoracoscopic brushing/Other
cPANEL199	9.2	7840	6.3	3958.28	EBUS-TBB-brushing
cPANEL200	9.5	1112	3.2	870	CT-guided needle washing
cPANEL201	9.6	436	7.2	293.6	EBUS-TBNA, EUS-FNA needle washing
cPANEL202	N.D.	26.64	N.D.	179	EBUS-TBB-brushing
cPANEL204	9.7	1712	4.7	505.84	Pleural effusion
cPANEL205	9.3	316.8	3.8	348.32	EBUS-TBB-brushing
cPANEL207	N.D.	42.8	3.6	163.52	CT-guided needle washing
cPANEL208	9.5	358.4	7.5	305.72	CT-guided needle washing
cPANEL209	8	60.4	N.D.	230.04	EBUS-TBB-brushing
cPANEL210	7.9	62	6.2	245.36	EBUS-TBNA, EUS-FNA needle washing
cPANEL211	9.7	259.2	4.7	175.8	EBUS-TBB-brushing
cPANEL212	9.5	226.4	5	239.96	CT-guided needle washing
cPANEL213	9.2	3904	4.2	1146.2	EBUS-TBB-brushing
cPANEL214	8.8	212	6.3	466	EBUS-TBB-brushing
cPANEL215	N.D.	56.4	N.D.	138.84	EBUS-TBB-brushing
cPANEL217	7.1	4760	2.6	3277.72	EBUS-TBNA, EUS-FNA needle washing
cPANEL219	9.5	12160	3.5	1203.72	EBUS-TBNA, EUS-FNA needle washing
cPANEL222	9.2	1000	4.1	747.4	CT-guided needle washing
cPANEL224	9.2	1384	4.9	510.08	EBUS-TBNA, EUS-FNA needle washing
cPANEL225	N.D.	50.4	5.6	172.68	EBUS-TBNA, EUS-FNA needle washing
cPANEL226	N.D.	26.08	N.D.	191.52	EBUS-TBB-brushing
cPANEL227	N.D.	17.6	5	259.6	EBUS-TBB-brushing
cPANEL228	N.D.	15.44	N.D.	165.76	EBUS-TBB-brushing
cPANEL229	N.D.	23.76	3.3	96.4	EBUS-TBB-brushing
cPANEL230	N.D.	10.8	N.D.	250.76	EBUS-TBB-brushing
cPANEL231	9.6	367.2	6.3	312.52	EBUS-TBNA, EUS-FNA needle washing
cPANEL232	9.6	408	6.8	330.72	EBUS-TBNA, EUS-FNA needle washing
cPANEL234	N.D.	15.28	1	896.52	Pleural effusion
cPANEL236	9.4	304	4.7	539.4	EBUS-TBB-brushing
cPANEL239	9.3	268	3.5	1046.84	EBUS-TBNA, EUS-FNA needle washing
cPANEL240	9.4	2632	4.1	801.36	EBUS-TBB-brushing
cPANEL241	9.7	57.2	5.8	267.56	EBUS-TBB-brushing
cPANEL242	9.2	85.6	5.6	627.96	EBUS-TBNA, EUS-FNA needle washing
cPANEL244	9.3	45.2	5.9	200.4	EBUS-TBB-brushing
cPANEL246	8.2	1256	5.5	390.08	EBUS-TBNA, EUS-FNA needle washing
cPANEL247	9.5	204.8	3.2	249.6	CT-guided needle washing
cPANEL248	9.6	1216	3.4	965.52	CT-guided needle washing
cPANEL249	N.D.	24.96	N.D.	208.72	EBUS-TBB-brushing
cPANEL250	9.5	248.8	3.1	354.76	EBUS-TBB-brushing
cPANEL251	9.4	116.8	7.4	184.4	EBUS-TBB-brushing
cPANEL252	9.2	5920	N.D.	235.32	Pleural effusion
cPANEL253	9.4	1688	5.5	1182.56	EBUS-TBB-brushing
cPANEL254	9.4	1352	6.6	469.8	CT-guided needle washing
cPANEL255	9.5	168.8	4.9	331.92	EBUS-TBB-brushing
cPANEL256	9.5	3288	3.5	2837.2	EBUS-TBNA, EUS-FNA needle washing
cPANEL258	8.4	62.4	N.D.	230.4	EBUS-TBB-brushing
cPANEL259	9.3	896	5.2	707.52	EBUS-TBNA, EUS-FNA needle washing
cPANEL260	N.D.	40.4	4.7	285.28	EBUS-TBNA, EUS-FNA needle washing
cPANEL261	9.4	1912	4.3	417.72	EBUS-TBB-brushing
cPANEL262	N.D.	34.88	5.5	224.56	EBUS-TBNA, EUS-FNA needle washing
cPANEL263	9.3	115.2	5.4	264.4	EBUS-TBB-brushing
cPANEL264	9.7	832	3.2	566.28	EBUS-TBB-brushing
cPANEL267	9.6	460	6.5	273.84	EBUS-TBB-brushing
cPANEL268	9.5	436	5.2	339.84	EBUS-TBB-brushing
cPANEL269	9.3	880	4.5	523.32	CT-guided needle washing
cPANEL270	9.5	377.6	5.2	356.36	EBUS-TBNA, EUS-FNA needle washing
cPANEL271	9.6	2192	6	835.44	EBUS-TBNA, EUS-FNA needle washing
cPANEL273	9.6	1512	4.1	1988.72	EBUS-TBNA, EUS-FNA needle washing
cPANEL274	8.6	100	3.9	625.8	EBUS-TBNA, EUS-FNA needle washing
cPANEL276	9.4	1952	6.9	675.68	CT-guided needle washing
cPANEL277	9.1	928	3.5	876.36	EBUS-TBNA, EUS-FNA needle washing
cPANEL278	9.3	2424	4.5	603.96	EBUS-TBB-brushing
cPANEL279	9.4	2400	4.2	2529.4	EBUS-TBNA, EUS-FNA needle washing
cPANEL280	9.5	2064	5.9	554.68	EBUS-TBB-brushing
cPANEL281	9.2	692	5.9	429.76	EBUS-TBNA, EUS-FNA needle washing
cPANEL282	9.5	160	3.9	423.2	EBUS-TBB-brushing
cPANEL283	9.2	8400	2.7	2139.52	EBUS-TBNA, EUS-FNA needle washing
cPANEL284	9.7	856	4.5	375.76	EBUS-TBB-brushing
cPANEL285	9.2	460	3.9	273.84	EBUS-TBB-brushing
cPANEL286	8.7	460	2.4	273.84	EBUS-TBNA, EUS-FNA needle washing
cPANEL287	9.6	568	4.3	517	EBUS-TBB-brushing
cPANEL288	8.5	1720	3.8	1589.36	EBUS-TBNA, EUS-FNA needle washing
cPANEL289	9.3	548	3.7	331.48	EBUS-TBB-brushing
cPANEL290	9.6	2304	2.8	522.08	Pleural effusion
cPANEL291	9.6	1048	5	529.56	Pleural effusion
cPANEL292	9.3	84	3.5	246.36	EBUS-TBB-brushing
cPANEL293	9.5	348	3.7	327.76	EBUS-TBB-brushing
cPANEL294	9.3	292.8	6.1	208.76	CT-guided needle washing
cPANEL295	8.8	105.6	6.4	220.4	CT-guided needle washing
cPANEL297	N.D.	18	N.D.	182.36	EBUS-TBNA, EUS-FNA needle washing
cPANEL298	9.3	5480	4.8	748.8	EBUS-TBB-brushing
cPANEL299	9.7	346	5	181.48	EBUS-TBB-brushing
