# Supplementary material for: Prospective multicenter validation of a next-generation sequencing panel using cytology specimens for lung cancer: cPANEL
Source: BMC Cancer. 2025 Oct 9;25:1538. doi: 10.1186/s12885-025-14770-0 (PMC12512683; doi:10.1186/s12885-025-14770-0)
Supplement: Supplementary file 4 — Supplementary Material 4. [file 12885_2025_14770_MOESM4_ESM.xlsx]

## Sheet: Sheet1
	#Supplemental Table4
	List of allele Frequency between cytology LCCP and tissue LCCP CDx
			Pearson's correlation coefficient	0.815229
	FFPE-ID	cytology-GM(%)	FFPE(%)	Mutation_Call
	cPANEL002	13.8	7.2	EGFR ex19 deletion
	cPANEL013	18.9	30.9	BRAF V600E
	cPANEL015	20.4	23.9	BRAF V600E
	cPANEL018	27.3	17.9	EGFR L858R
	cPANEL019	13.7	17.2	EGFR ex19 deletion
	cPANEL021	2.8	3.4	EGFR ex20 insertion
	cPANEL024	39.8	20.4	EGFR ex19 deletion
	cPANEL032	15.2	33.4	EGFR L858R
	cPANEL035	5.1	3.2	BRAF V600E
	cPANEL036	22.4	27.7	EGFR L858R
	cPANEL037	41.3	24.2	EGFR L858R
	cPANEL042	54.8	54.5	EGFR ex19 deletion
	cPANEL044	29.1	23.6	KRAS G12C
	cPANEL045	5.5	5.2	EGFR ex19 deletion
	cPANEL048	14	2	EGFR E709X
	cPANEL048	13.4	1.9	EGFR G719X
	cPANEL056	35.5	36	HER2 ex20 insertion
	cPANEL062	60.8	17.6	EGFR L858R
	cPANEL068	1.5	1.9	MET ex14 skipping
	cPANEL073	7.7	8.1	EGFR ex19 deletion
	cPANEL077	8.3	5.6	EGFR L858R
	cPANEL077	5.7	6.7	EGFR E709X
	cPANEL088	66.6	89.3	KRAS G12C
	cPANEL089	71.7	83.9	EGFR ex20 insertion
	cPANEL090	10.2	12.1	KRAS G12C
	cPANEL097	40.1	43.7	EGFR ex19 deletion
	cPANEL098	59.8	35.9	EGFR ex19 deletion
	cPANEL106	31.2	31.1	KRAS G12C
	cPANEL108	80.2	21.4	EGFR L861Q
	cPANEL115	27.4	37.1	EGFR L858R
	cPANEL122	12.7	25.8	EGFR ex19 deletion
	cPANEL141	5.6	11	EGFR L858R
	cPANEL142	12.4	15.6	KRAS G12C
	cPANEL143	40.4	58.1	KRAS G12C
	cPANEL144	60.9	52.1	EGFR ex19 deletion
	cPANEL152	88.1	41.5	EGFR ex19 deletion
	cPANEL153	56	39.6	EGFR ex19 deletion
	cPANEL154	2	0.3	BRAF V600E
	cPANEL156	54.4	72.8	EGFR L858R
	cPANEL157	59.1	34.2	MET ex14 skipping
	cPANEL158	87.5	82.7	EGFR L858R
	cPANEL159	88.4	94.5	EGFR ex19 deletion
	cPANEL160	55	19.9	EGFR ex20 insertion
	cPANEL163	43.5	56.8	KRAS G12C
	cPANEL166	46.8	45.5	EGFR L858R
	cPANEL166	24.4	22.5	EGFR S768I
	cPANEL169	27.3	8.5	EGFR G719X
	cPANEL181	1.5	10.7	EGFR ex19 deletion
	cPANEL186	65.8	60.1	KRAS G12C
	cPANEL187	55.4	51.4	EGFR L858R
	cPANEL196	35.2	17.7	EGFR L858R
	cPANEL200	28.3	21.6	EGFR G719X
	cPANEL202	42.1	30.7	MET ex14 skipping
	cPANEL204	14.1	15.6	KRAS G12C
	cPANEL211	31.4	32.7	EGFR ex19 deletion
	cPANEL226	2.2	14.4	EGFR ex20 insertion
	cPANEL227	11.9	10.3	KRAS G12C
	cPANEL228	17.1	23	EGFR L858R
	cPANEL229	16.4	15.3	EGFR ex19 deletion
	cPANEL232	0.8	1.7	EGFR L858R
	cPANEL239	39.9	22.9	KRAS G12C
	cPANEL248	30.3	31.5	HER2 ex20 insertion
	cPANEL250	53.7	40.4	EGFR L858R
	cPANEL255	76.9	58.9	EGFR L858R
	cPANEL258	2.8	2.4	EGFR L858R
	cPANEL260	11.2	20.6	KRAS G12C
	cPANEL268	50.8	70.7	KRAS G12C
	cPANEL270	1.1	4.1	EGFR ex19 deletion
	cPANEL277	23.7	22.7	EGFR L858R
	cPANEL280	32	33.2	EGFR L858R
	cPANEL280	33.1	33.6	EGFR p.L747S
	cPANEL280	21.5	23.8	EGFR p.T790M
	cPANEL282	24.2	23.4	EGFR L858R
	cPANEL282	25.8	27	EGFR E709X
	cPANEL284	79.8	76.2	EGFR L858R
	cPANEL292	1.3	10.8	EGFR L858R
	cPANEL293	21.9	18.2	EGFR ex19 deletion
	cPANEL299	8.8	18.4	EGFR L858R
