# Supplementary material for: Prospective multicenter validation of a next-generation sequencing panel using cytology specimens for lung cancer: cPANEL
Source: BMC Cancer. 2025 Oct 9;25:1538. doi: 10.1186/s12885-025-14770-0 (PMC12512683; doi:10.1186/s12885-025-14770-0)
Supplement: Supplementary file 5 — Supplementary Material 5. [file 12885_2025_14770_MOESM5_ESM.xlsx]

## Sheet: Sheet1
	#Supplemental Table5 dsDNA/total DNA ratio for purified nucleotides
							cytology-GM	FFPE
						average	27.1277	12.7733
						median	26.2316	12.9554
							Paired-T test	5.45463e-11
	dsDNA/total DNA ratio for cytology-GM samples					dsDNA/total DNA ratio for FFPE samples
	Cytology-ID	DNA(ng/ul)	dsDNA(ng/ul)	dsDNA/totalDNA ratio		FFPE-ID	DNA(ng/ul)	dsDNA(ng/ul)	dsDNA/totalDNA ratio
	cPANEL002	245.71	106	43.1403		cPANEL002	12.511	0.19	1.51866
	cPANEL003	91.94	28.6	31.1072		cPANEL003	26.848	2.88	10.7271
	cPANEL008	204.91	80.4	39.2367		cPANEL008	21.124	1.3	6.15414
	cPANEL010	30.17	8.04	26.649		cPANEL010	7.271	0.512	7.04167
	cPANEL013	3195.69	1600	50.0674		cPANEL013	28.119	3.58	12.7316
	cPANEL015	141.33	69.2	48.9634		cPANEL015	3.781	0.48	12.6951
	cPANEL018	31.56	11	34.8542		cPANEL018	6.483	0.28	4.31899
	cPANEL019	733.68	326	44.4335		cPANEL019	68.705	12.4	18.0482
	cPANEL020	225.27	73.8	32.7607		cPANEL020	5.557	1.03	18.5352
	cPANEL021	806.94	560	69.398		cPANEL021	20.314	2.98	14.6697
	cPANEL024	20.71	4.47	21.5838		cPANEL024	9.049	0.34	3.75732
	cPANEL032	27.84	9.71	34.8779		cPANEL032	10.844	0.452	4.1682
	cPANEL035	64.44	30.3	47.0205		cPANEL035	62.479	7.66	12.2601
	cPANEL036	13.52	0.85	6.28698		cPANEL036	18.67	3.86	20.6749
	cPANEL037	92.09	49.6	53.8604		cPANEL037	7.029	0.524	7.45483
	cPANEL042	296	149	50.3378		cPANEL042	8.252	1.42	17.2079
	cPANEL044	63.45	24.2	38.1403		cPANEL044	3.526	0.29	8.22462
	cPANEL045	36.69	11.1	30.2535		cPANEL045	8.918	0.154	1.72684
	cPANEL048	38.55	10	25.9403		cPANEL048	5.382	1	18.5805
	cPANEL056	23.38	4.12	17.6219		cPANEL056	7.509	0.968	12.8912
	cPANEL057	41.69	13.3	31.9021		cPANEL057	8.955	0.572	6.38749
	cPANEL062	67.68	43	63.5343		cPANEL062	4.076	0.099	2.42885
	cPANEL064	2342.15	1060	45.2576		cPANEL064	52.79	10.3	19.5113
	cPANEL068	266.78	127	47.6048		cPANEL068	18.649	3.16	16.9446
	cPANEL073	13.95	1.15	8.24373		cPANEL073	10.005	1.74	17.3913
	cPANEL077	18.65	1.16	6.21984		cPANEL077	9.734	1.7	17.4646
	cPANEL084	75.87	24.1	31.7649		cPANEL084	8.071	0.388	4.80733
	cPANEL086	63.19	25.3	40.038		cPANEL086	11.081	0.872	7.86933
	cPANEL088	37.02	15.1	40.7888		cPANEL088	9.61	1.43	14.8803
	cPANEL089	471.83	48.2	10.2155		cPANEL089	22.717	3.1	13.6462
	cPANEL090	13.09	0.74	5.65317		cPANEL090	5.69	0.678	11.9156
	cPANEL094	1775.62	612	34.4668		cPANEL094	63.628	9.04	14.2076
	cPANEL097	267.92	37.4	13.9594		cPANEL097	78.381	16.8	21.4338
	cPANEL098	106.18	50	47.0898		cPANEL098	13.249	1.6	12.0764
	cPANEL106	161.3	52.9	32.796		cPANEL106	4.928	0.846	17.1672
	cPANEL108	62.96	20.1	31.925		cPANEL108	84.869	17.5	20.62
	cPANEL115	55.94	6.32	11.2978		cPANEL115	7.286	0.912	12.5172
	cPANEL122	46.89	12.3	26.2316		cPANEL122	3.028	0.166	5.48217
	cPANEL141	41.67	12.4	29.7576		cPANEL141	412.048	93.4	22.6673
	cPANEL142	26.13	3.52	13.4711		cPANEL142	6.139	0.926	15.0839
	cPANEL143	65.33	16.2	24.7972		cPANEL143	15.341	3.12	20.3377
	cPANEL144	29.02	4.44	15.2998		cPANEL144	12.649	1.69	13.3607
	cPANEL149	27.29	6.18	22.6457		cPANEL149	23.209	4.9	21.1125
	cPANEL152	47.14	11.8	25.0318		cPANEL152	13.761	1.51	10.973
	cPANEL153	107.93	33	30.5754		cPANEL153	10.237	0.816	7.97109
	cPANEL154	144.44	55.8	38.632		cPANEL154	48.666	8.84	18.1646
	cPANEL156	13.47	0.53	3.93467		cPANEL156	13.07	1.68	12.8539
	cPANEL157	65.15	11.6	17.8051		cPANEL157	15.931	1.51	9.47838
	cPANEL158	473.71	274	57.8413		cPANEL158	8.993	0.38	4.22551
	cPANEL159	930.34	302	32.4613		cPANEL159	26.761	2.9	10.8367
	cPANEL160	50.07	11.4	22.7681		cPANEL160	11.084	1.09	9.83399
	cPANEL163	35.03	0.75	2.14102		cPANEL163	6.652	0.47	7.06554
	cPANEL166	30.97	5.24	16.9196		cPANEL166	5.432	0.258	4.74963
	cPANEL169	36.42	7.26	19.9341		cPANEL169	9.705	1.4	14.4256
	cPANEL171	32.22	5.9	18.3116		cPANEL171	2.673	0.242	9.0535
	cPANEL181	91.74	32	34.8812		cPANEL181	14.003	2.04	14.5683
	cPANEL186	440.2	184	41.7992		cPANEL186	17.943	3.02	16.8311
	cPANEL187	21.56	3.04	14.1002		cPANEL187	17.917	0.714	3.98504
	cPANEL196	22.53	2.74	12.1616		cPANEL196	6.475	0.5	7.72201
	cPANEL200	84.38	27.8	32.9462		cPANEL200	10.909	1.33	12.1918
	cPANEL202	10	0.67	6.7		cPANEL202	4.453	0.706	15.8545
	cPANEL204	84.01	42.8	50.9463		cPANEL204	20.64	3.12	15.1163
	cPANEL211	24.92	6.48	26.0032		cPANEL211	1.847	0.0536	2.902
	cPANEL219	579.91	304	52.4219		cPANEL219	3.338	0.588	17.6153
	cPANEL226	12.81	0.65	5.07416		cPANEL226	16.88	3.8	22.5118
	cPANEL227	14.13	0.44	3.11394		cPANEL227	5.602	0.994	17.7437
	cPANEL228	11.34	0.16	1.41093		cPANEL228	6.033	0.694	11.5034
	cPANEL229	13.89	0.59	4.24766		cPANEL229	10.266	1.33	12.9554
	cPANEL232	38.9	10.2	26.2211		cPANEL232	16.148	3	18.5782
	cPANEL239	99.66	6.7	6.72286		cPANEL239	18.747	2.36	12.5887
	cPANEL248	94.32	30.4	32.2307		cPANEL248	14.385	0.664	4.61592
	cPANEL250	31.16	6.22	19.9615		cPANEL250	5.046	0.724	14.348
	cPANEL255	31.73	4.22	13.2997		cPANEL255	34.777	5.9	16.9652
	cPANEL258	16.49	1.56	9.46028		cPANEL258	6.03	0.184	3.05141
	cPANEL260	16.29	1.01	6.20012		cPANEL260	31.426	6.74	21.4472
	cPANEL263	23.38	2.88	12.3182		cPANEL263	3.867	0.26	6.72356
	cPANEL268	48.35	10.9	22.544		cPANEL268	7.444	1.62	21.7625
	cPANEL270	44.75	9.44	21.095		cPANEL270	5.01	0.556	11.0978
	cPANEL277	84.09	23.2	27.5895		cPANEL277	27.52	5.46	19.8401
	cPANEL280	106.4	51.6	48.4962		cPANEL280	14.642	2.22	15.1619
	cPANEL282	31.9	4	12.5392		cPANEL282	4.114	0.602	14.633
	cPANEL284	62.38	21.4	34.3059		cPANEL284	8.676	1.69	19.479
	cPANEL292	18.49	2.1	11.3575		cPANEL292	3.028	0.612	20.2114
	cPANEL293	40.46	8.7	21.5027		cPANEL293	2.852	0.394	13.8149
	cPANEL299	32.79	8.64	26.3495		cPANEL299	6.484	1.14	17.5817
