# Supplementary material for: Prospective multicenter validation of a next-generation sequencing panel using cytology specimens for lung cancer: cPANEL
Source: BMC Cancer. 2025 Oct 9;25:1538. doi: 10.1186/s12885-025-14770-0 (PMC12512683; doi:10.1186/s12885-025-14770-0)
Supplement: Supplementary file 6 — Supplementary Material 6. [file 12885_2025_14770_MOESM6_ESM.xlsx]

## Sheet: Sheet1
Supplemental Table 6. Comparison of background artifactural nucleotide substitution between FFPE and cytology (formaldehyde-free fixation).
paired t-test is examined and the multiple testing is adjusted by the Benjamini-Hochberg method. (p.adj)
nucleotide substitution	group1	group2	n	p	p.adj	p.adj.signif	mean%VAF-Cytology	mean%VAF-FFPE	sdCytology	sdFFPE	artifactural mechanism
A>C	Cytology	FFPE	715	0.263	0.3945	ns	0.012	0.007	0.104	0.058
A>G	Cytology	FFPE	8189	0.713	0.713	ns	0.015	0.015	0.104	0.087
A>T	Cytology	FFPE	5138	0.17	0.34	ns	0.009	0.008	0.065	0.03
C>A	Cytology	FFPE	3061	0.117	0.2808	ns	0.018	0.025	0.199	0.174
C>G	Cytology	FFPE	1603	0.22	0.377143	ns	0.013	0.008	0.157	0.046
C>T	Cytology	FFPE	5031	0.00121	0.00726	**	0.018	0.025	0.085	0.124	deamination
G>A	Cytology	FFPE	5274	0.0547	0.1641	ns	0.024	0.028	0.121	0.103
G>C	Cytology	FFPE	1599	0.378	0.488727	ns	0.007	0.009	0.008	0.082
G>T	Cytology	FFPE	2762	1.08e-05	0.0001296	***	0.011	0.024	0.071	0.129	oxidation
T>A	Cytology	FFPE	4753	0.0361	0.1444	ns	0.016	0.011	0.157	0.061
T>C	Cytology	FFPE	6345	0.433	0.488727	ns	0.017	0.019	0.132	0.104
T>G	Cytology	FFPE	1015	0.448	0.488727	ns	0.022	0.016	0.213	0.127
