# Supplementary material for: Prospective multicenter validation of a next-generation sequencing panel using cytology specimens for lung cancer: cPANEL
Source: BMC Cancer. 2025 Oct 9;25:1538. doi: 10.1186/s12885-025-14770-0 (PMC12512683; doi:10.1186/s12885-025-14770-0)
Supplement: Supplementary file 7 — Supplementary Material 7. [file 12885_2025_14770_MOESM7_ESM.xlsx]

## Sheet: Sheet1
	#Supplemental Table 7. List of Discordant Results between cytology compact panel and tissue CDx
	Specimen ID	Compact Panel (Cytology)						CDx Reference Test (Tissue)						3rd Anaritical Test for confirmation
		Method/Sample type	Detected Mutation1	Note1 (VAF%) *Mutation Score for RNA fusion (mutation positive read counts per 100K total reads)	NOTE2 (Variant)	Detected Mutation2	Mutation2 VAF%	CDx Reference TEST1	Method/Sample type	Detected Mutation1	CDx Reference TEST2	Detected Mutation2	Mutation2 VAF%	Method/Sample type	Detected Mutation	Analytical method	Note (VAF%)
	cPANEL020	CT-guided	ALK fusion	3139				Oncomine DxTT	CT-guided	Negative				CT-guided	Negative	singleplex RT-PCR
	cPANEL057	TBB/TBLB	ALK fusion	9099				Ventana OptiView	TBB/TBLB	Negative	Vysis FISH	TBB/TBLB	Negative	TBB/TBLB	Negative	singleplex RT-PCR
	cPANEL086	TBB/TBLB	RET fusion	768				Oncomine DxTT	TBB/TBLB	Negative				TBB/TBLB	Negative	singleplex RT-PCR
	cPANEL106	TBNA/TBAC	KRAS G12C	31.2%				Oncomine DxTT		Negative	Therascreen		KRAS G12C				voting criteria
	cPANEL133	TBB/TBLB BALF	Negative					Oncomine DxTT	TBB/TBLB	EGFR L858R				TBB/TBLB BALF	Negative	ddPCR
	cPANEL154	TBNA/TBAC	BRAF V600E	2.0%				Oncomine DxTT	TBNA/TBAC	Negative	AmoyDx Multi	Pleural effusion	Negative	TBNA/TBAC	BRAF V600E	ddPCR	1.6
	cPANEL160	TBB/TBLB	EGFR ex20 insertion	55%	EGFR_p.A767_V769dup_p.M766_A767insASV			Oncomine DxTT		Negative	Cobas		EGFR ex20 insertion				voting criteria
	cPANEL226	TBB/TBLB	EGFR ex20 insertion	2.2%	EGFR_p.D770delinsGY			Oncomine DxTT		EGFR ex20 insertion	Cobas		Negative				voting criteria
	cPANEL229	TBB/TBLB	EGFR ex19 deletion	16.4%	EGFR_p.E746_S752delinsV	KRAS G12C	0.5	Oncomine DxTT	TBB/TBLB	EGFR ex19 deletion							Validation by 3rd method was not performed
	cPANEL234	Pleural effusion	Negative					Cobas	Pleural effusion	EGFR L858R				Pleural effusion	EGFR L858R	ddPCR	4.1
